# Supplementary material for: IL-6 Mediates Cross-Talk between Tumor Cells and Activated Fibroblasts in the Tumor Microenvironment
Source: Oxford University Press journal article supplement (doi:10.1158/0008-5472.can-17-2268), 2018-07-05
Supplement: 00085472can172268-sup-186947_3_supp_4842931_prrjy6.xlsx [file 00085472can172268-sup-186947_3_supp_4842931_prrjy6.xlsx]

## Sheet: Pos Normalization
RayBio® Cytokine Antibody Arrays -- Human Cytokine Antibody Array 3 G Series
Positive Control Normalization without Background
	Blank	TE1	TE6	TE11	HCE7	HEF	FEF3	FEF3303	TE1+HEF	TE1+FEF3	TE1+FEF3303	TE6+HEF	TE6+FEF3	TE6+FEF3303	TE11+HEF	TE11+FEF3	TE11+FEF3303	HCE7+HEF	HCE7+FEF3	HCE7+FEF3303
POS	23759	23759	23759	23759	23759	23759	23759	23759	23759	23759	23759	23759	23759	23759	23759	23759	23759	23759	23759	23759
Neg	6.75	8.25132	8.4447	10.0632	7.30867	7.47339	9.2393	9.26775	8.20484	5.38941	8.79572	6.52642	5.64109	6.32932	9.06199	6.26731	7.31654	6.95113	6.08812	5.59604
ENA-78	4.5	3.35647	1.77783	3.00393	2.52023	3.44926	3.5765	2.9896	4.16754	2.83653	3.19844	253.344	878.048	116.77	25.8129	183.647	6.91745	85.7798	611.188	281.237
GCSF	3.5	3.91588	2.37044	4.80629	1.51214	2.87438	2.98042	2.9896	2.60471	4.53845	2.66537	7.71304	12.7538	5.68347	13.1811	9.32808	1.59634	10.0569	7.72152	6.31348
GM-CSF	3.5	78.877	2.96305	16.2212	324.102	2.87438	4.76867	3.58751	30.7356	47.0864	43.712	64.6709	393.895	159.654	210.348	245.445	70.2387	1071.95	1764.66	696.778
GRO	30.5	2021.71	41213.7	47888.7	41610	4304.67	1506.9	255.311	2397.38	3205.85	1602.95	67765.6	59091.6	50896	57924.8	61681.4	52695.6	59461.4	62837.1	57260.9
GRO-α	3.5	4.47529	248.304	316.614	92.2405	2.87438	4.76867	5.97919	5.20942	3.97114	3.19844	2251.02	1951.82	342.042	165.313	655.881	464.001	1106.26	1147.54	537.793
I-309	4.5	2.23765	5.33349	3.00393	2.52023	3.44926	3.5765	3.58751	3.12565	2.83653	2.66537	2.96655	3.43371	3.61676	3.84448	3.49803	4.78901	4.1411	5.34567	2.86976
IL-1α	18	5.0347	17.1857	4.80629	21.1699	1.72463	3.5765	2.39168	9.8979	2.26922	7.46303	20.7659	23.0549	7.23351	20.87	26.8182	9.57801	14.7896	21.9766	22.9581
IL-1 b	2	3.35647	3.55566	4.2055	2.01619	3.44926	4.17259	2.9896	2.60471	2.83653	3.19844	3.55986	2.94318	3.10008	2.19685	1.74902	2.12845	3.54951	4.15774	4.01767
IL-2	2.5	2.79706	3.55566	3.00393	3.02428	5.17389	4.17259	3.58751	3.12565	3.40384	2.1323	3.55986	2.45265	2.5834	2.19685	1.74902	2.66056	4.73268	3.56378	2.86976
IL-3	4.5	1.67823	1.77783	2.40314	3.52832	2.29951	4.17259	3.58751	2.08377	3.97114	4.26459	5.3398	2.94318	3.10008	3.29527	4.08104	2.66056	5.32427	2.96982	2.29581
IL-4	2.5	3.91588	3.55566	4.80629	2.01619	4.02413	2.98042	4.18543	3.12565	2.83653	2.1323	2.37324	2.94318	2.5834	2.74606	3.49803	2.66056	2.95793	2.37585	2.86976
IL-5	3	2.23765	2.96305	2.40314	4.03237	2.87438	2.38434	2.39168	2.60471	2.83653	2.1323	11.2729	2.45265	1.03336	10.9842	14.5751	2.66056	8.28219	10.6913	7.46138
IL-6	0.5	10282	122.078	15.0197	2080.2	7684.95	1422.85	1418.26	68163.7	59503.1	53178.4	77660.8	64197.1	59816	71893.4	50153.6	51019.9	77435.5	77676.7	75128.6
IL-7	1.5	2.23765	2.37044	3.00393	2.52023	2.29951	2.38434	2.9896	2.60471	3.40384	2.1323	14.2395	3.92424	5.16679	9.8858	4.08104	3.19267	9.46536	3.56378	3.44371
IL-8	26	461.514	13813.8	18074	10426.7	3965.5	3324.96	2998.56	3529.9	5249.28	3622.24	31318.5	33973.1	28386.9	26265.5	27513.8	31475.5	27850.6	31261.5	29083.9
IL-10	30	20.1388	1.77783	70.292	14.6173	28.7438	1.78825	8.96879	2.60471	6.24037	6.92996	14.2395	23.5454	27.384	9.33659	20.9882	19.6881	18.3391	18.4129	21.8102
IL-12 p40p70	9	5.59411	5.33349	3.00393	4.03237	3.44926	2.98042	2.9896	2.08377	2.26922	1.59922	5.3398	4.41476	2.5834	8.23817	6.41306	4.25689	4.73268	9.50341	10.9051
IL-13	2	2.79706	4.14827	0.600786	1.51214	2.29951	2.38434	4.18543	3.6466	3.40384	3.19844	7.11973	1.96212	3.10008	2.74606	2.91503	1.59634	3.54951	2.37585	1.1479
IL-15	19.5	14.5447	21.9266	18.0236	4.03237	3.44926	5.36475	1.79376	7.29319	8.50959	7.99611	28.4789	32.8655	20.1505	15.3779	25.0692	14.367	15.3812	28.5102	36.733
IFN-γ	3	4.47529	2.96305	1.80236	2.01619	3.44926	2.38434	2.9896	2.08377	3.40384	10.1284	1.77993	2.45265	7.23351	2.19685	0.583005	4.25689	3.54951	3.56378	14.9228
MCP-1	4.5	36.9212	490.089	6.00786	32795.3	31180.1	33455.2	38791.8	47724.6	40024.6	32954.1	45377.6	41821.6	40760.8	38554.6	39072.4	43279.3	40428.9	41789.5	39500.6
MCP-2	3	3.91588	3.55566	2.40314	2.01619	4.02413	3.5765	4.78335	3.12565	3.97114	3.19844	43.905	1.96212	3.10008	3.29527	4.08104	4.78901	121.867	2.96982	4.59162
MCP-3	4.5	3.91588	2.37044	3.60472	2.52023	1872.95	9.53734	2.39168	590.748	21.5576	5.33074	1181.87	188.854	86.2855	271.86	4.66404	16.4955	2572.8	703.846	950.465
MCSF	3	4.47529	2.96305	4.80629	3.52832	3.44926	2.98042	2.39168	2.60471	2.26922	2.1323	2.96655	2.94318	1.55004	3.29527	2.33202	3.19267	4.1411	5.34567	6.31348
MDC	1.5	2.79706	2.96305	4.80629	2.01619	2.87438	2.38434	2.9896	3.12565	4.53845	3.73152	4.74649	2.94318	1.55004	2.74606	5.83005	3.72478	2.36634	0.593963	4.01767
MIG	19	17.3418	6.51872	13.8181	5.04046	2.87438	3.5765	3.58751	1.56283	1.70192	9.59533	30.8522	12.7538	13.4337	13.1811	16.9072	9.57801	18.9307	26.1344	16.6446
MIP-1 δ	4	2.79706	3.55566	3.00393	2.52023	4.02413	2.38434	3.58751	3.12565	3.40384	2.66537	2.37324	1.96212	2.06672	2.19685	2.33202	3.72478	2.36634	4.15774	3.44371
RANTES	9	25.1735	13.63	72.0943	328.134	5.74876	2.38434	5.97919	2838.09	2473.46	2472.4	126.968	89.7669	11.8836	287.238	222.125	129.835	2846.71	3725.34	3567.69
SCF	3.5	2.79706	2.37044	1.80236	2.52023	4.02413	4.17259	3.58751	3.6466	3.40384	4.26459	2.96655	2.94318	1.55004	4.39369	4.08104	2.66056	5.32427	5.93963	4.01767
SDF-1	6	5.59411	4.14827	9.01179	2.52023	5.74876	4.17259	2.9896	3.6466	3.97114	2.1323	24.919	39.7329	22.7339	42.8385	29.1503	19.156	32.5372	29.6982	20.0883
TARC	3.5	2.79706	2.37044	0	2.52023	3.44926	3.5765	4.18543	2.60471	2.83653	2.1323	1.77993	1.96212	2.06672	3.29527	4.08104	2.66056	2.36634	1.78189	2.29581
TGF- β1	23	46.9906	29.6305	34.2448	23.6902	7.47339	28.0159	13.7521	35.4241	16.4519	24.5214	61.7043	54.4488	22.7339	60.9625	68.2116	32.9909	27.2129	47.517	40.7506
TNF-α	16.5	16.7823	26.0749	30.0393	13.1052	4.02413	1.78825	2.39168	10.4188	2.26922	10.6615	34.412	17.1685	10.8503	18.124	29.7333	17.5597	12.4233	33.8559	35.585
TNF-β	2.5	5.0347	7.11133	6.00786	7.05665	4.02413	2.38434	4.18543	2.08377	3.40384	3.73152	15.4261	8.82953	5.16679	4.39369	5.24705	12.2386	3.54951	5.34567	22.3841
EGF	3.5	2.79706	2.37044	3.60472	2.52023	3.44926	3.5765	3.58751	2.60471	2.26922	2.1323	3.55986	2.45265	6.71683	2.19685	2.33202	3.72478	3.54951	2.96982	2.86976
IGF-I	3	2.23765	3.55566	2.40314	2.52023	4.02413	2.38434	2.9896	3.12565	2.83653	2.66537	1.77993	2.94318	3.10008	3.29527	3.49803	1.59634	0	2.96982	3.44371
Angiogenin	3.5	506.827	993.215	1736.87	8337.93	8306.96	5305.74	1574.32	9949.48	7837.9	2579.01	10070.9	8377.75	1470.99	11222	10384.5	5260.99	16684.5	12985.2	9431.19
Oncostatin M	3	6.15353	2.96305	4.80629	3.02428	2.87438	4.17259	2.9896	3.12565	2.83653	2.66537	3.55986	3.43371	4.13344	1.09842	4.66404	1.59634	4.1411	7.72152	4.59162
Thrombopoietin	1.5	1.67823	4.14827	5.40707	2.52023	2.87438	2.98042	3.58751	3.6466	3.40384	1.59922	2.37324	2.45265	2.5834	3.29527	1.74902	2.12845	2.95793	2.96982	2.86976
VEGF	2.5	63.2135	3.55566	54.6715	3.02428	21.2704	85.24	3.58751	517.296	364.211	190.307	203.506	167.761	12.4003	450.353	506.632	107.487	220.661	153.242	108.477
PDGF BB	3.5	813.944	2.96305	84.11	75.6069	2.29951	1.78825	2.9896	4.16754	80.5575	313.447	2.37324	2.45265	3.10008	43.3877	64.7136	53.7433	4.1411	4.7517	4.59162
Leptin	1.5	3.91588	3.55566	4.2055	1.51214	3.44926	1.78825	3.58751	3.6466	2.83653	2.1323	3.55986	2.45265	3.10008	2.74606	2.91503	2.66056	4.1411	4.7517	2.86976
